# Supplementary material for: Derivatives of 2-(3,4-dinitro-1H-pyrazol-1-yl) acetonitrile: design strategy, syntheses, and properties of a series of new melt-cast explosives
Source: Royal Society of Chemistry journal article supplement (doi:10.1039/d4nj05467a), 2025-01-01
Supplement: d4nj05467a1.pdf [file d4nj05467a1.pdf]

## *Supporting Information*

### **Derivatives of 2-(3,4-dinitro-1*H*-pyrazol-1-yl) acetonitrile:**

### **Design strategy, syntheses, and properties of a series of new melt-cast explosives**

Tongwei Zhang, Xiaofeng Yuan, Ze Xu, Ming Lu,\* Yuangang Xu\*

School of Chemistry and Chemical Engineering, Nanjing University of Science and  
Technology, Xiaolingwei 200, Nanjing 210094, China.

\* Corresponding authors: [luming302@126.com](mailto:luming302@126.com), [yuangangxu@163.com](mailto:yuangangxu@163.com)

## Table of contents

|                                             |     |
|---------------------------------------------|-----|
| I. General remarks.....                     | s3  |
| II . Crystal data .....                     | s4  |
| III. Calculation of heats of formation..... | s10 |
| IV . References.....                        | s12 |
| V . Copies of NMR spectra .....             | s13 |

## I. General remarks

**General methods:** Unless otherwise noted, all reagents were obtained from commercial suppliers and used without further purification. NMR spectra were obtained on a Bruker AVANCE III 500 spectrometer. The  $^1\text{H}$  NMR (500 MHz) chemical shifts were measured relative to DMSO- $d_6$  as the internal reference (DMSO- $d_6$ :  $\delta = 2.50$  ppm). The  $^{13}\text{C}$  NMR (125.72 MHz) chemical shifts were given using DMSO- $d_6$  as the internal standard (DMSO- $d_6$ :  $\delta = 39.52$  ppm). Infrared (IR) spectra were recorded on a Perkin-Elmer Spectrum II IR Spectrometers using KBr pellets. X-Ray single-crystal diffraction data were collected on a Rigaku AFC-10/Saturn 724+CCD diffractometer with graphite-monochromated Mo  $K\alpha$  radiation ( $\lambda=0.71073$  Å) using the multi-scan technique. Thermal decomposition temperatures were determined by using differential scanning calorimetry (DSC) on a Mettler-Toledo TGA/DSC 1 Stare system at a heating rate of  $5\text{ }^\circ\text{C}\cdot\text{min}^{-1}$  from room temperature to  $400\text{ }^\circ\text{C}$  under nitrogen atmosphere. The detonation parameters, including detonation velocity and detonation pressure, were calculated by using the EXPLO5 (version 6.05.04) program. The impact and friction sensitivities were measured on a standard BAM fall hammer and a BAM friction tester<sup>1</sup>. Hirshfeld surfaces and 2D fingerprint plots were generated by CrystalExplorer (version 17.5)<sup>2</sup>. The electrostatic potential (ESP) surfaces and non-covalent interaction (NCI) analyses were analyzed and drawn by using Multiwfn (version 3.5)<sup>3</sup> and Visual Molecular Dynamics (VMD, version 1.9.3) program suites.

## II. Crystal data

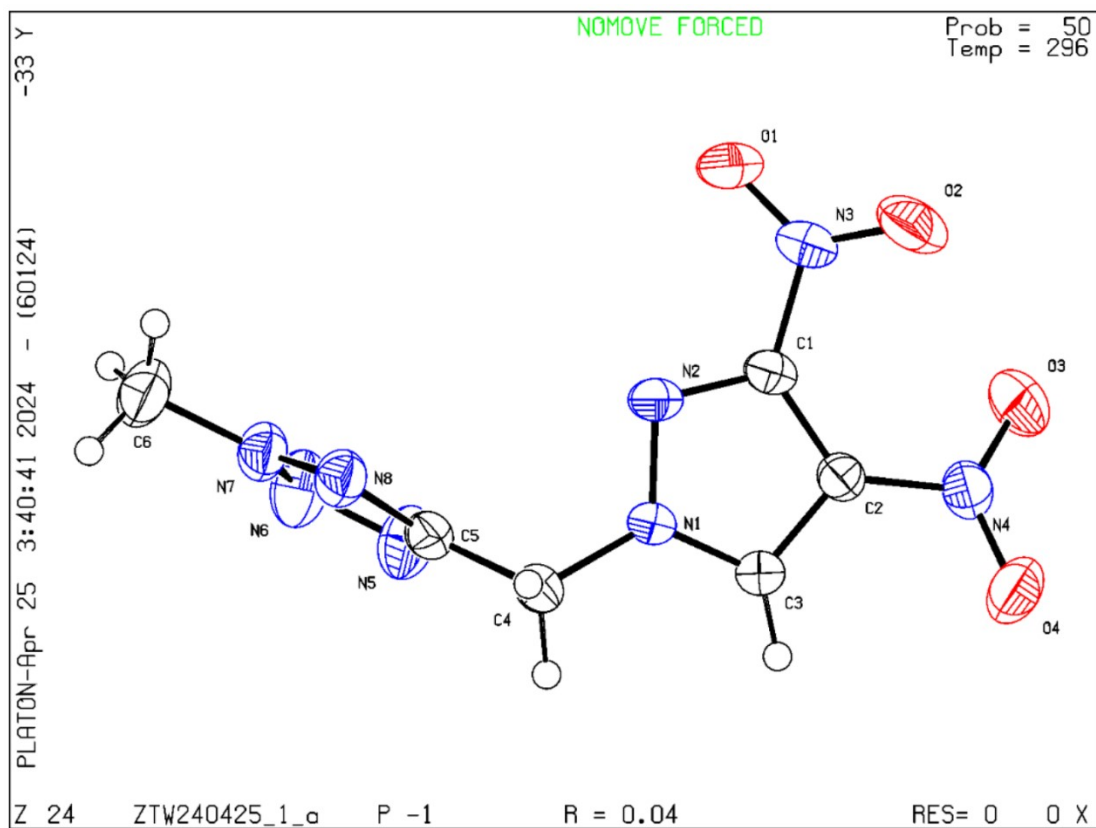

Figure S1. ORTEP diagram of compound **4** at room temperature. Thermal ellipsoids are shown at the 50% probability level

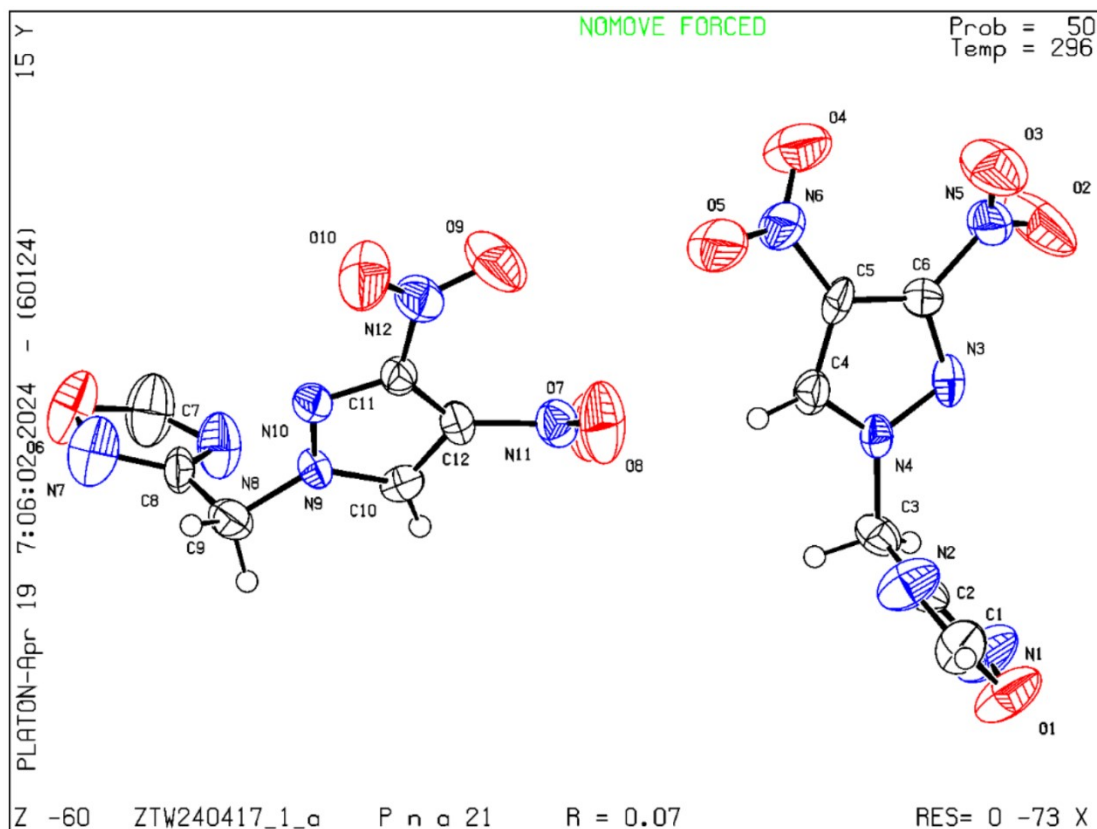

**Figure S2.** ORTEP diagram of compound **6** at room temperature. Thermal ellipsoids are shown at the 50% probability level

|                                                |                                |
|------------------------------------------------|--------------------------------|
| Volume/Å <sup>3</sup>                          | 508.71(4)                      |
| Z                                              | 2                              |
| $\rho_{\text{calc}}/\text{g}/\text{m}^3$       | 1.659                          |
| $\mu/\text{mm}^{-1}$                           | 0.141                          |
| F(000)                                         | 260                            |
| Crystal size/mm <sup>3</sup>                   | 0.120 x 0.100 x 0.090          |
| 2 $\Theta$ range for data collection/°         | 2.931 to 27.483                |
| Index ranges                                   | -8<=h<=8, -9<=k<=9, -14<=l<=14 |
| Reflections collected                          | 7846                           |
| Independent reflections                        | 2314 [R(int) = 0.0241]         |
| Data / restraints / parameters                 | 2314 / 0 / 164                 |
| Goodness-of-fit on F <sup>2</sup>              | 1.033                          |
| Final R indices [I>2sigma(I)]                  | R1 = 0.0423, wR2 = 0.1020      |
| Final R indices (all data)                     | R1 = 0.0570, wR2 = 0.1104      |
| Largest diff. peak and hole/ e.Å <sup>-3</sup> | 0.239 and -0.239               |

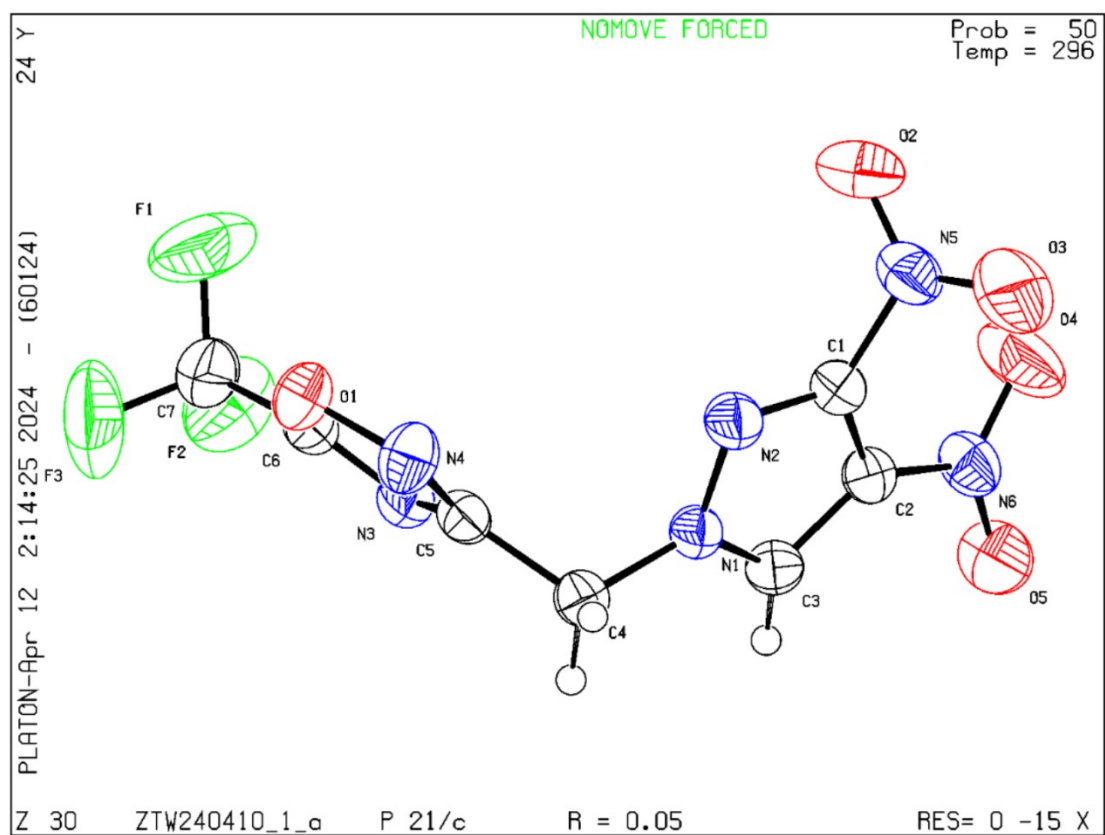

**Figure S3.** ORTEP diagram of compound **7** at room temperature. Thermal ellipsoids are shown at the 50% probability level

|                                                |                                                                    |
|------------------------------------------------|--------------------------------------------------------------------|
| Volume/Å <sup>3</sup>                          | 508.71(4)                                                          |
| Z                                              | 2                                                                  |
| $\rho_{\text{calc}}/\text{g}/\text{m}^3$       | 1.659                                                              |
| $\mu/\text{mm}^{-1}$                           | 0.141                                                              |
| F(000)                                         | 260                                                                |
| Crystal size/mm <sup>3</sup>                   | 0.120 x 0.100 x 0.090                                              |
| 2 $\Theta$ range for data collection/°         | 2.931 to 27.483                                                    |
| Index ranges                                   | -8 $\leq$ h $\leq$ 8, -9 $\leq$ k $\leq$ 9, -14 $\leq$ l $\leq$ 14 |
| Reflections collected                          | 7846                                                               |
| Independent reflections                        | 2314 [R(int) = 0.0241]                                             |
| Data / restraints / parameters                 | 2314 / 0 / 164                                                     |
| Goodness-of-fit on F <sup>2</sup>              | 1.033                                                              |
| Final R indices [I $>$ 2 $\sigma$ (I)]         | R1 = 0.0423, wR2 = 0.1020                                          |
| Final R indices (all data)                     | R1 = 0.0570, wR2 = 0.1104                                          |
| Largest diff. peak and hole/ e.Å <sup>-3</sup> | 0.239 and -0.239                                                   |

**Table S1.** Crystal data for compound **4** at room temperature

|                     |                                                             |
|---------------------|-------------------------------------------------------------|
| Identification code | <b>4</b>                                                    |
| CCDC number         | 2379758                                                     |
| Empirical formula   | C <sub>6</sub> H <sub>6</sub> N <sub>8</sub> O <sub>4</sub> |
| Formula weight      | 254.19                                                      |
| Temperature/K       | 296(2)                                                      |
| Crystal system      | Triclinic                                                   |
| Space group         | P-1                                                         |
| a/Å                 | 6.7014(3)                                                   |
| b/Å                 | 7.4750(4)                                                   |
| c/Å                 | 11.2966(5)                                                  |
| $\alpha$ /°         | 97.876(2)                                                   |
| $\beta$ /°          | 104.754(2)                                                  |
| $\gamma$ /°         | 107.211(2)                                                  |

**Table S2.** Crystal data for compound **6** at room temperature

|                                                |                                                             |
|------------------------------------------------|-------------------------------------------------------------|
| Identification code                            | <b>6</b>                                                    |
| CCDC number                                    | 2379757                                                     |
| Empirical formula                              | C <sub>6</sub> H <sub>4</sub> N <sub>6</sub> O <sub>5</sub> |
| Formula weight                                 | 240.15                                                      |
| Temperature/K                                  | 296(2)                                                      |
| Crystal system                                 | Orthorhombic                                                |
| Space group                                    | Pna2 <sub>1</sub>                                           |
| a/Å                                            | 15.229(5)                                                   |
| b/Å                                            | 5.3345(15)                                                  |
| c/Å                                            | 23.556(6)                                                   |
| α/°                                            | 90                                                          |
| β/°                                            | 90                                                          |
| γ/°                                            | 90                                                          |
| Volume/Å <sup>3</sup>                          | 1913.7(10)                                                  |
| Z                                              | 8                                                           |
| ρ <sub>calc</sub> /g/m <sup>3</sup>            | 1.667                                                       |
| μ/mm <sup>-1</sup>                             | 0.147                                                       |
| F(000)                                         | 976                                                         |
| Crystal size/mm <sup>3</sup>                   | 0.180 x 0.160 x 0.120                                       |
| 2θ range for data collection/°                 | 2.675 to 27.563                                             |
| Index ranges                                   | -19 ≤ h ≤ 18, -6 ≤ k ≤ 6, -30 ≤ l ≤ 26                      |
| Reflections collected                          | 13949                                                       |
| Independent reflections                        | 4058 [R(int) = 0.0761]                                      |
| Data / restraints / parameters                 | 4058 / 1 / 307                                              |
| Goodness-of-fit on F <sup>2</sup>              | 1.034                                                       |
| Final R indices [I > 2σ(I)]                    | R1 = 0.0651, wR2 = 0.1354                                   |
| Final R indices (all data)                     | R1 = 0.1356, wR2 = 0.1572                                   |
| Largest diff. peak and hole/ e.Å <sup>-3</sup> | 0.266 and -0.213                                            |



**Table S3.** Crystal data for compound **7** at room temperature

|                                                |                                                                            |
|------------------------------------------------|----------------------------------------------------------------------------|
| Identification code                            | 7                                                                          |
| CCDC number                                    | 2379760                                                                    |
| Empirical formula                              | C <sub>7</sub> H <sub>3</sub> F <sub>3</sub> N <sub>6</sub> O <sub>5</sub> |
| Formula weight                                 | 308.15                                                                     |
| Temperature                                    | 296(2)                                                                     |
| Crystal system                                 | Monoclinic                                                                 |
| Space group                                    | P2 <sub>1</sub> /c                                                         |
| a/Å                                            | 8.8436(5)                                                                  |
| b/Å                                            | 8.0309(5)                                                                  |
| c/Å                                            | 15.9838(10)                                                                |
| α/°                                            | 90                                                                         |
| β/°                                            | 95.681(2)                                                                  |
| γ/°                                            | 90                                                                         |
| Volume/Å <sup>3</sup>                          | 1129.63(12)                                                                |
| Z                                              | 4                                                                          |
| ρ <sub>calc</sub> /g/m <sup>3</sup>            | 1.812                                                                      |
| μ/mm <sup>-1</sup>                             | 0.183                                                                      |
| F(000)                                         | 616                                                                        |
| Crystal size/mm <sup>3</sup>                   | 0.200 x 0.180 x 0.080                                                      |
| 2θ range for data collection/°                 | 2.314 to 27.516                                                            |
| Index ranges                                   | -11 ≤ h ≤ 11, -8 ≤ k ≤ 10, -19 ≤ l ≤ 20                                    |
| Reflections collected                          | 11013                                                                      |
| Independent reflections                        | 2584 [R(int) = 0.0327]                                                     |
| Data / restraints / parameters                 | 2584 / 0 / 191                                                             |
| Goodness-of-fit on F <sup>2</sup>              | 1.030                                                                      |
| Final R indices [I > 2σ(I)]                    | R1 = 0.0496, wR2 = 0.1401                                                  |
| Final R indices (all data)                     | R1 = 0.0824, wR2 = 0.1329                                                  |
| Largest diff. peak and hole/ e.Å <sup>-3</sup> | 0.427 and -0.418                                                           |

### III. Calculation of heats of formation

Computations were performed by using the *Gaussian 09* suite of programs.<sup>4</sup> The elementary geometric optimization and the frequency analysis were performed at the level of the Becke three parameter, Lee-Yan-Parr (B3LYP)<sup>5</sup> functional with the 6-311++G\*\* basis set.<sup>6</sup> All of the optimized structures were characterized to be local energy minima on the potential surface without any imaginary frequencies. Atomization energies were calculated by the CBS-4M.<sup>7</sup> All the optimized structures were characterized to be true local energy minima on the potential-energy surface without imaginary frequencies.

The predictions of heats of formation (HOF) of compounds used the hybrid DFT-B3LYP methods with the 6-311++G\*\* basis set through designed isodesmic reactions. The isodesmic reaction processes, that is, the number of each kind of formal bond is conserved, were used with the application of the bond separation reaction (BSR) rules. The molecule was broken down into a set of two heavy-atom molecules containing the same component bonds. The solid phase of heat of formation can be calculated according to the equation 1.

$$\Delta H_{solid} = \Delta H_{gas} - \Delta H_{sub} \quad (1)$$

Here, the heat of sublimation ( $\Delta H_{sub}$ ) was calculated by using an equation (2) proposed by Edward F. C. Byrd, et al.

$$\Delta H_{sub} = aA^2 + b(v\sigma_{tot}^2)^{1/2} + c \quad (2)$$

For all the ionic salts, calculation of the HOFs was simplified by using equation (3)

$$\Delta_f H(\text{ionic salts}, 298\text{K}) = \Sigma \Delta_f H(\text{cation}, 298\text{K}) + \Sigma \Delta_f H(\text{anion}, 298\text{K}) - \Delta H_L \quad (3)$$

In eq 3,  $\Delta H_L$  is the lattice energy of the ionic salts, which could be predicted by using the equation (4) suggested by by Jenkins et al.<sup>5</sup>

$$\Delta H_L = U_{POT} + [p(n_M/2 - 2) + q(n_X/2 - 2)]RT \quad (4)$$

In eq 4,  $n_M$  and  $n_X$  depended on the nature of ions  $M_p^+$  and  $X_q^-$ , respectively, and are equal to 3 for monatomic ions, 5 for linear polyatomic ions, and 6 for nonlinear polyatomic ions.

The lattice-potential energy ( $U_{POT}$ ) was calculated according to equation (5), in which  $\rho_m$  is the density (in  $\text{g}/\text{cm}^3$ ) and  $M_m$  is the chemical formula mass of the ionic material; the coefficients  $\gamma$  and  $\delta$  were taken from the literature.<sup>8</sup>

$$U_{POT} (\text{kJ/mol}) = \gamma (\rho_m/M_m)^{1/3} - \delta \quad (5)$$

## IV. References

1. United Nations. Recommendations on the transport of dangerous goods [M]. Manual of tests and criteria, 6<sup>th</sup>, United Nations Publication, New York, **2015**: 79-127.
2. Turner, M. J.; McKinnon, J. J.; Wolff, S. K.; Grimwood, D. J.; Spackman, P. R.; Jayatilaka, D.; Spackman, M. A. CrystalExplorer17 (2017). University of Western Australia. <http://hirshfeldsurface.net>
3. Lu T.; Chen, F. Multiwfn: A Multifunctional Wavefunction Analyzer. *J. Comput. Chem.* **2012**, 33, 580-592.
4. Frisch, M. J.; Trucks, G. W.; Schlegel, H. B.; Scuseria, G. E.; Robb, M. A.; Cheeseman, J. R.; Scalmani, G.; Barone, V.; Mennucci, B.; Petersson, G. A.; Nakatsuji, H.; Caricato, M.; Li, X.; Hratchian, H. P.; Izmaylov, A. F.; Bloino, J.; Zheng, G.; Sonnenberg, J. L.; Hada, M.; Ehara, M.; Toyota, K.; Fukuda, R.; Hasegawa, J.; Ishida, M.; Nakajima, T.; Honda, Y.; Kitao, O.; Nakai, H.; Vreven, T.; Montgomery, J. A.; Peralta, J. E.; Ogliaro, F.; Bearpark, M.; Heyd, J. J.; Brothers, E.; Kudin, K. N.; Staroverov, V. N.; Kobayashi, R.; Normand, J.; Raghavachari, K.; Rendell, A.; Burant, J. C.; Iyengar, S. S.; Tomasi, J.; Cossi, M.; Rega, N.; Millam, J. M.; Klene, M.; Knox, J. E.; Cross, J. B.; Bakken, V.; Adamo, C.; Jaramillo, J.; Gomperts, R.; Stratmann, R. E.; Yazyev, O.; Austin, A. J.; Cammi, R.; Pomelli, C.; Ochterski, J. W.; Martin, R. L.; Morokuma, K.; Zakrzewski, V. G.; Voth, G. A.; Salvador, P.; Dannenberg, J. J.; Dapprich, S.; Daniels, A. D.; Farkas, O.; Foresman, J. B.; Ortiz, J. V.; Cioslowski, J.; Fox, D. J.; Gaussian 09, Revision A.1; Gaussian, Inc.: Wallingford CT, 2009.
5. (a) Becke, A. D. Density - Functional Thermochemistry. III. The Role of Exact Exchange. *J. Chem. Phys.* **1993**, 98, 5648– 5652; (b) Stephens, P. J.; Devlin, F. J.; Chabalowski, C. F.; Frisch, M. J. Ab Initio Calculation of Vibrational Absorption and Circular Dichroism Spectra Using Density Functional Force Fields *J. Phys. Chem.* **1994**, 98, 11623– 11627.
6. Hariharan, P. C.; Pople J. A. The Influence of Polarization Functions on Molecular

Orbital Hydrogenation Energies. *Theor. Chim. Acta.* **1973**, 28, 213– 222.

7. Ochterski, J. W.; Petersson, G. A.; Montgomery, J. A. A Complete Basis Set Model Chemistry. V. Extensions to Six or More Heavy Atoms. *J. Chem. Phys.* **1996**, 104, 2598– 2619.

8. (a) Jenkins, H. D. B.; Tudela, D.; Glasser, L. Lattice Potential Energy Estimation for Complex Ionic Salts from Density Measurements. *Inorg. Chem.* **2002**, 41, 2364– 2367; (b) Jenkins, H. D. B.; Roobottom, H. K.; Passmore, J.; Glasser, L. Relationships among Ionic Lattice Energies, Molecular (Formula Unit) Volumes, and Thermochemical Radii. *Inorg. Chem.* **1999**, 38, 3609– 3620.

## V. Copies of NMR spectra

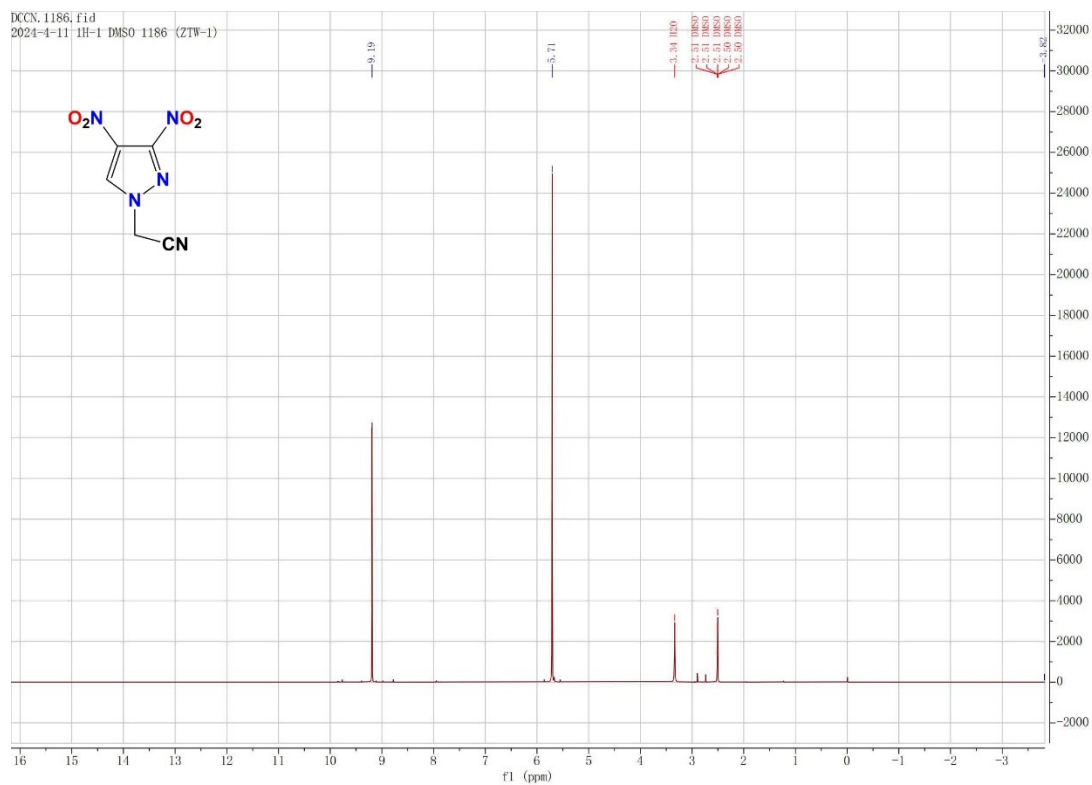

Figure S4.  $^1\text{H}$  NMR spectrum in  $\text{DMSO-}d_6$  for compound 2

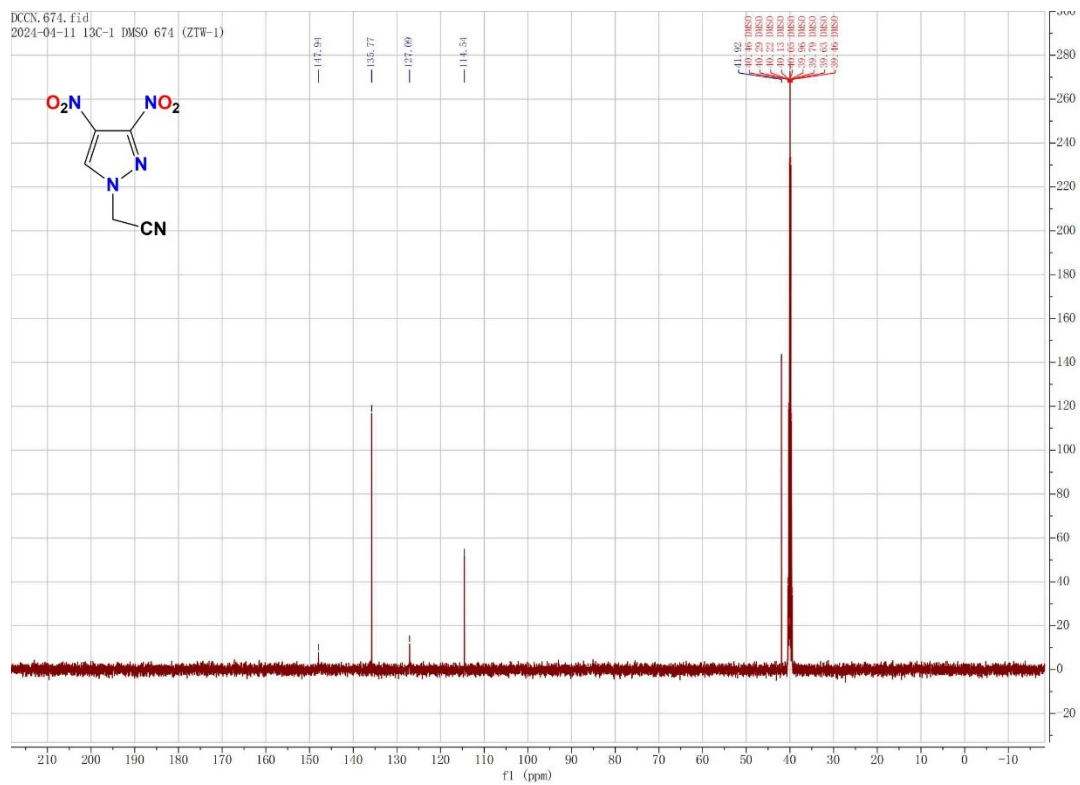

Figure S5.  $^{13}\text{C}$  NMR spectrum in  $\text{DMSO-}d_6$  for compound 2

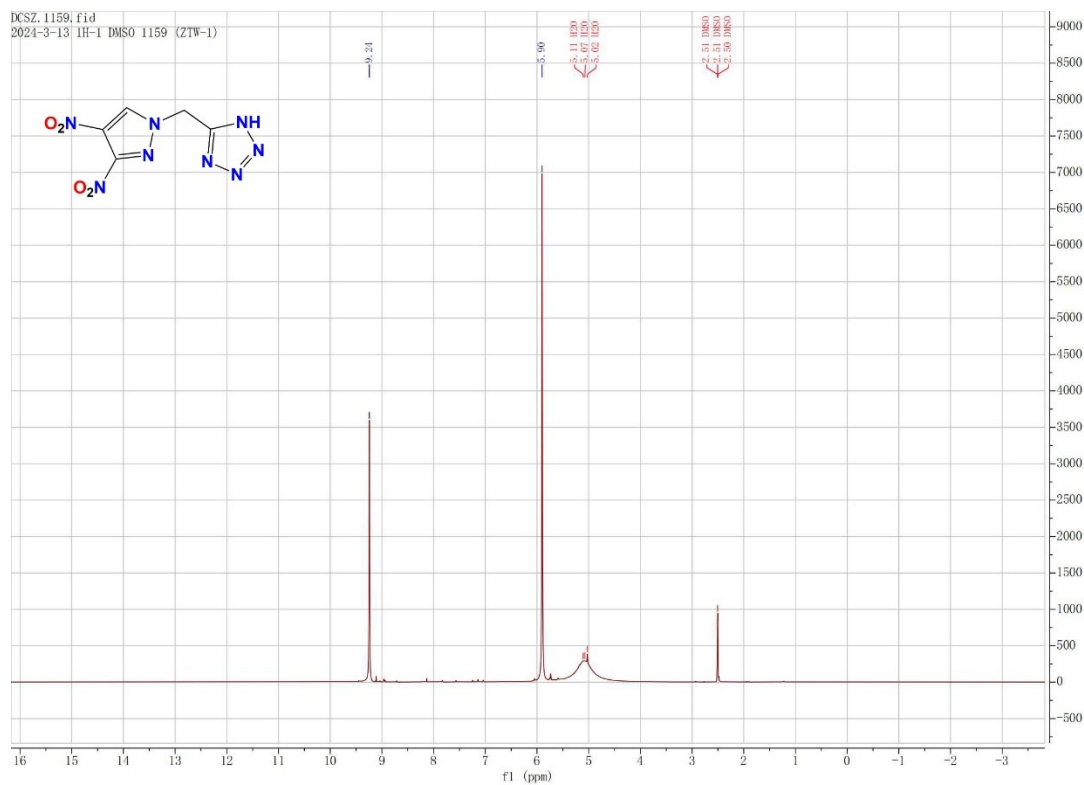

Figure S6.  $^1\text{H}$  NMR spectrum in  $\text{DMSO-}d_6$  for compound 3

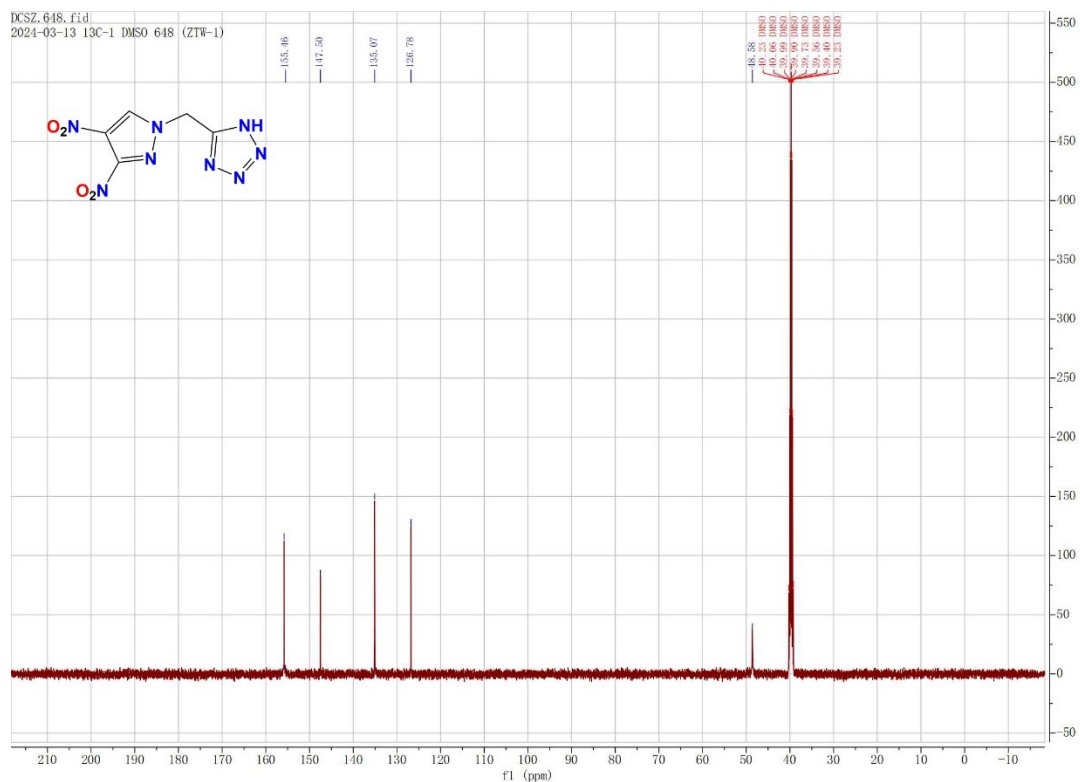

Figure S7.  $^{13}\text{C}$  NMR spectrum in  $\text{DMSO-}d_6$  for compound **3**

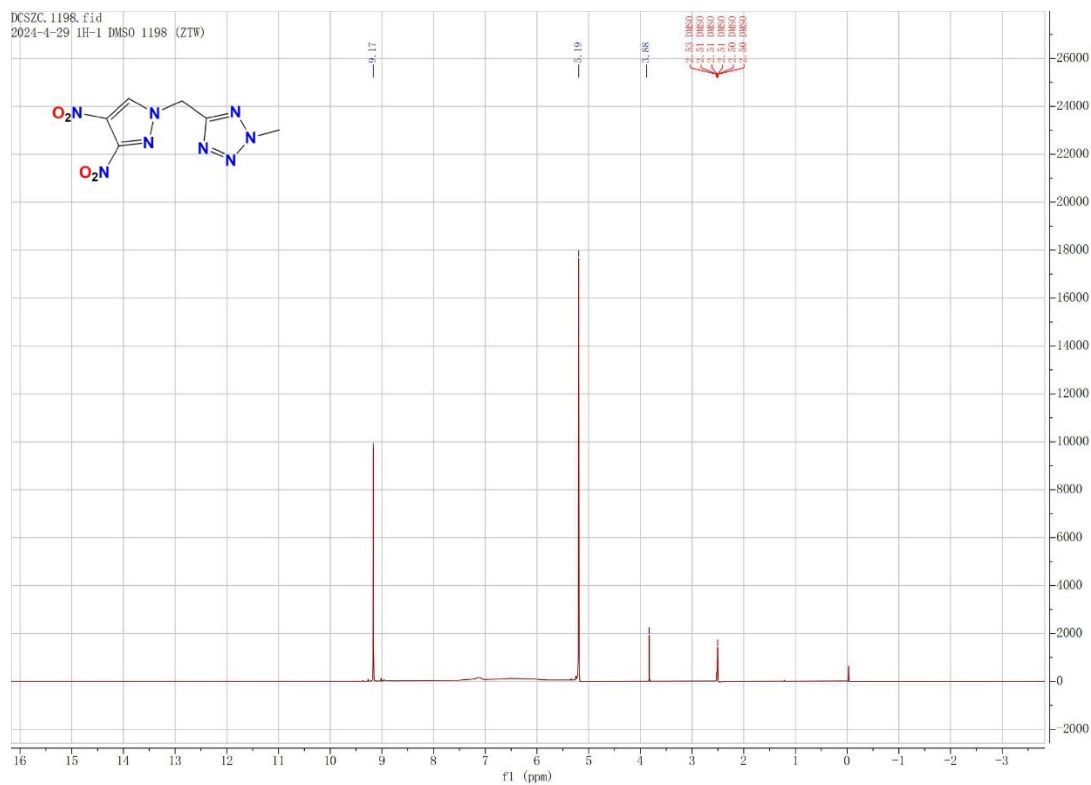

Figure S8.  $^1\text{H}$  NMR spectrum in  $\text{DMSO-}d_6$  for compound **4**

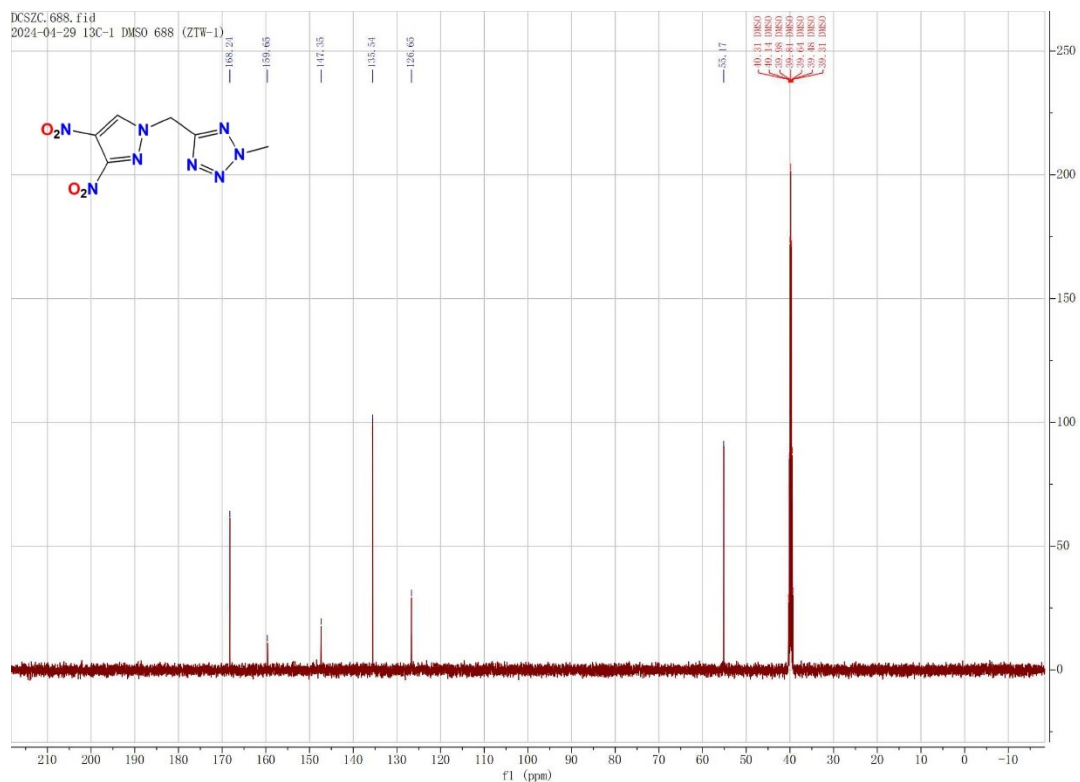

Figure S9.  $^{13}\text{C}$  NMR spectrum in  $\text{DMSO-}d_6$  for compound **4**

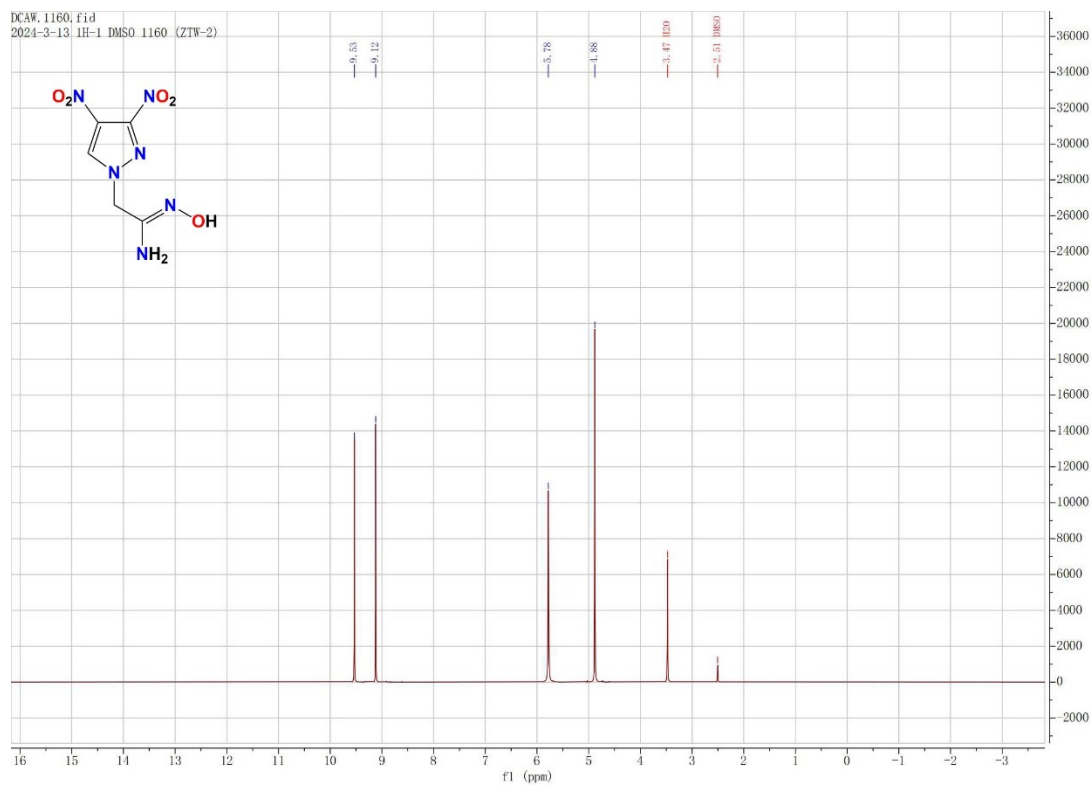

Figure S10.  $^1\text{H}$  NMR spectrum in  $\text{DMSO-}d_6$  for compound **5**





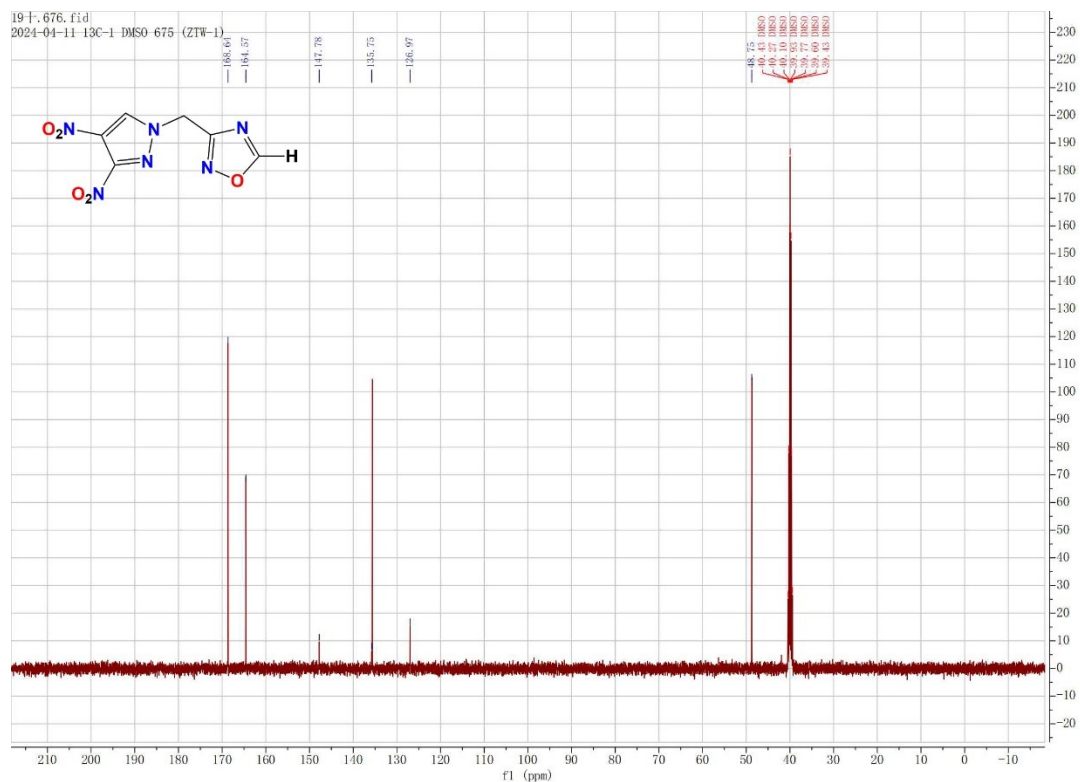

Figure S13.  $^{13}\text{C}$  NMR spectrum in  $\text{DMSO-}d_6$  for compound 6

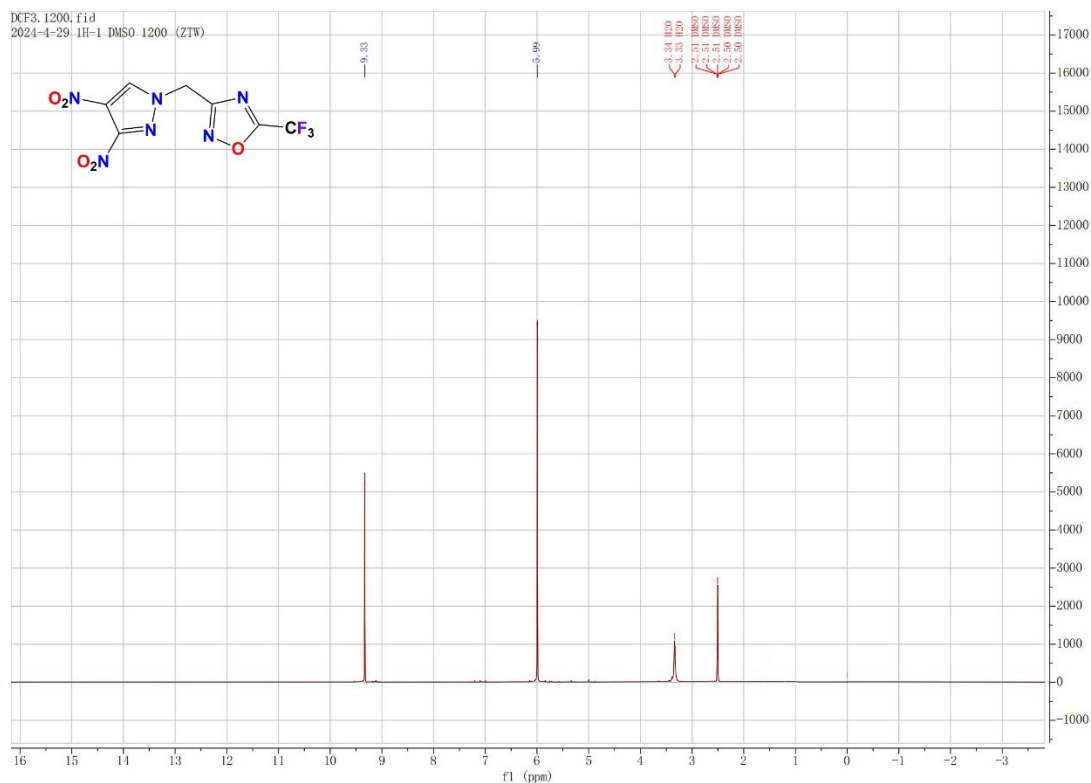

Figure S14.  $^1\text{H}$  NMR spectrum in  $\text{DMSO-}d_6$  for compound 7

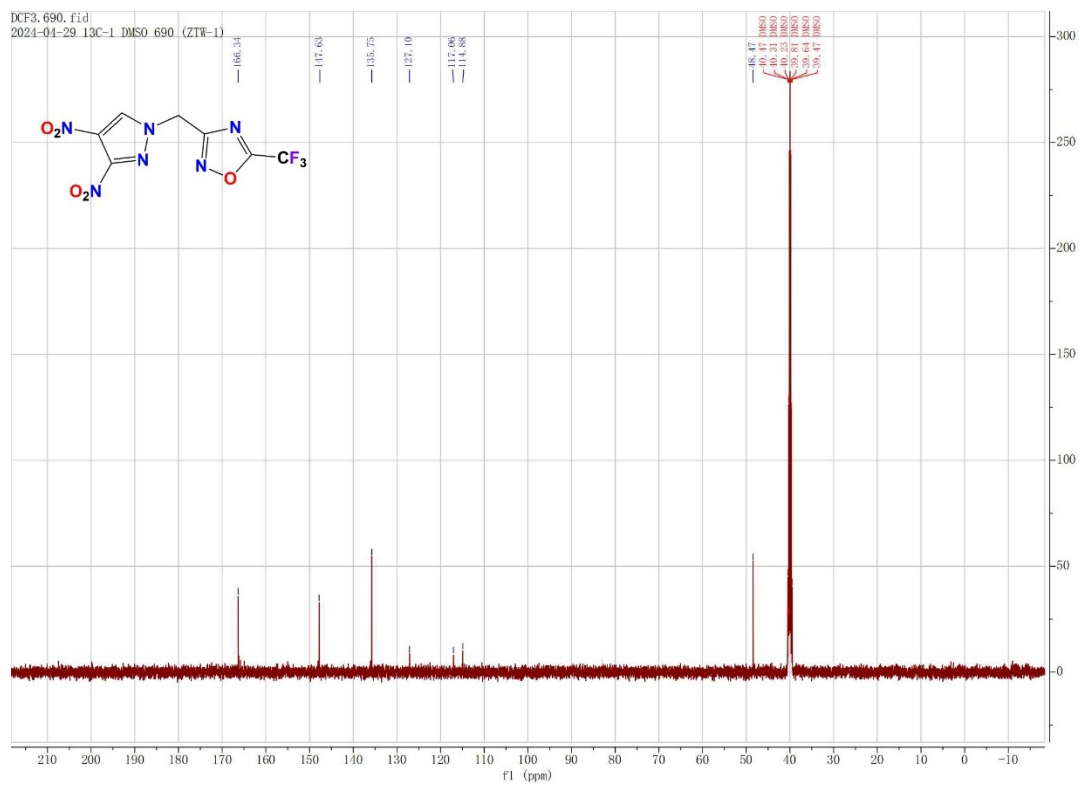

Figure S15.  $^{13}\text{C}$  NMR spectrum in  $\text{DMSO-}d_6$  for compound 7
